# Supplementary material for: Co-supported catalysts on nitrogen and sulfur co-doped vertically-aligned carbon nanotubes for oxygen reduction reaction
Source: Royal Society of Chemistry journal article supplement (doi:10.1039/c6ra00752j), 2016-01-01

## Supplementary Information

### **Co supported catalysts on nitrogen and sulfur co-doped vertically-aligned carbon nanotubes for oxygen reduction reaction** Yunmei Liu <sup>a</sup>,

Bin Zhao <sup>a,\*</sup>, Ying Zhang <sup>a</sup>, Huijuan Zhang <sup>a</sup>, Ke Zhan <sup>a</sup>, Junhe Yang <sup>a</sup>, Jianqiang Li

<sup>b,\*</sup>

*<sup>a</sup>School of Materials Science and Engineering, University of Shanghai for Science and Technology, Shanghai 200093, China*

*<sup>b</sup>National Engineering Laboratory for Hydrometallurgical Cleaner Production Technology, Institute of Process Engineering, Chinese Academy of Sciences, Beijing 100190, China*

Fig. S1 EDS spectra and relative element contents for the various catalysts: (a) as-sputtered, (b) Co/NS-CNT-400, (c) Co/NS-CNT-600 and (d) Co/NS-CNT-800.

When comparing the element contents among different catalysts, Si and Al were neglected and the relative contents were re-calculated by only considering the elements of C, N, O, Co and S.

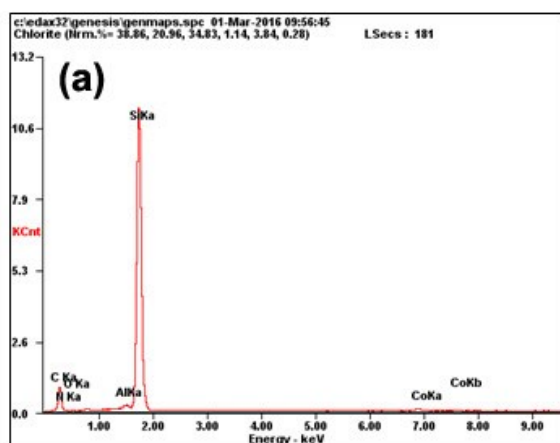

| Element <sup>⊖</sup> | Wt% <sup>⊖</sup>        | At% <sup>⊖</sup>   |
|----------------------|-------------------------|--------------------|
| CK <sup>⊖</sup>      | 48.93 <sup>⊖</sup>      | 68.69 <sup>⊖</sup> |
| NK <sup>⊖</sup>      | 01.29 <sup>⊖</sup>      | 01.55 <sup>⊖</sup> |
| OK <sup>⊖</sup>      | 00.65 <sup>⊖</sup>      | 00.69 <sup>⊖</sup> |
| AlK <sup>⊖</sup>     | 00.74 <sup>⊖</sup>      | 00.47 <sup>⊖</sup> |
| SiK <sup>⊖</sup>     | 46.97 <sup>⊖</sup>      | 28.20 <sup>⊖</sup> |
| CoK <sup>⊖</sup>     | 01.41 <sup>⊖</sup>      | 00.40 <sup>⊖</sup> |
| Matrix <sup>⊖</sup>  | Correction <sup>⊖</sup> | ZAF <sup>⊖</sup>   |

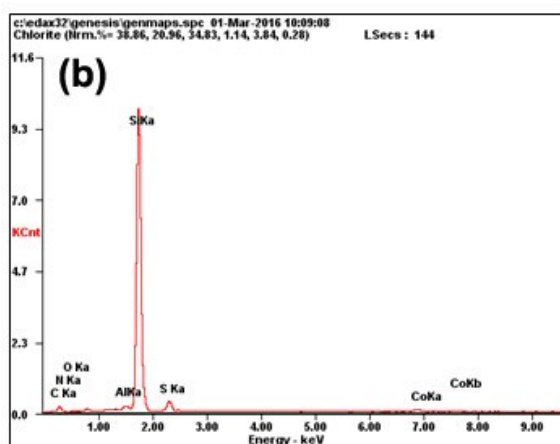

| Element <sup>⊖</sup> | Wt% <sup>⊖</sup>        | At% <sup>⊖</sup>   |
|----------------------|-------------------------|--------------------|
| CK <sup>⊖</sup>      | 25.25 <sup>⊖</sup>      | 44.30 <sup>⊖</sup> |
| NK <sup>⊖</sup>      | 00.97 <sup>⊖</sup>      | 01.47 <sup>⊖</sup> |
| OK <sup>⊖</sup>      | 00.54 <sup>⊖</sup>      | 00.40 <sup>⊖</sup> |
| AlK <sup>⊖</sup>     | 00.95 <sup>⊖</sup>      | 00.74 <sup>⊖</sup> |
| SiK <sup>⊖</sup>     | 65.63 <sup>⊖</sup>      | 49.25 <sup>⊖</sup> |
| SK <sup>⊖</sup>      | 04.89 <sup>⊖</sup>      | 03.21 <sup>⊖</sup> |
| CoK <sup>⊖</sup>     | 01.77 <sup>⊖</sup>      | 00.63 <sup>⊖</sup> |
| Matrix <sup>⊖</sup>  | Correction <sup>⊖</sup> | ZAF <sup>⊖</sup>   |

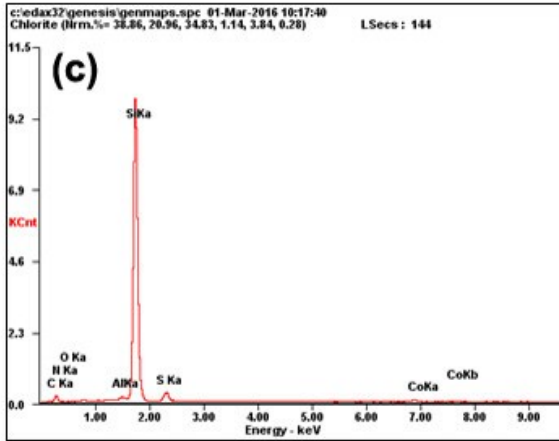

| Element | Wt%        | At%   |
|---------|------------|-------|
| CK      | 26.44      | 45.62 |
| NK      | 01.27      | 01.88 |
| OK      | 00.21      | 00.28 |
| AlK     | 00.87      | 00.67 |
| SiK     | 65.21      | 48.12 |
| SK      | 04.53      | 02.93 |
| CoK     | 01.47      | 00.52 |
| Matrix  | Correction | ZAF   |

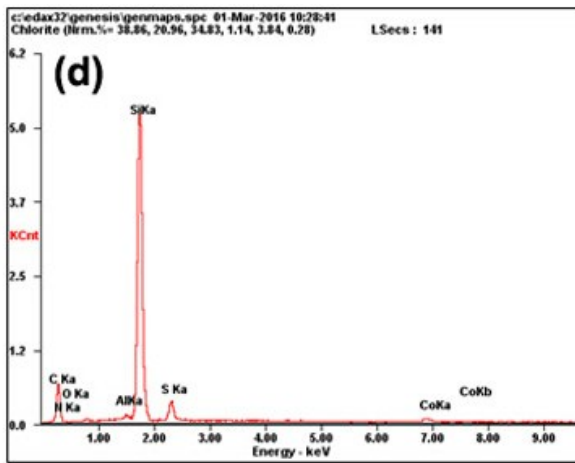

| Element | Wt%        | At%   |
|---------|------------|-------|
| CK      | 55.43      | 74.14 |
| NK      | 01.66      | 01.91 |
| OK      | 00.33      | 00.33 |
| AlK     | 00.65      | 00.39 |
| SiK     | 36.68      | 20.98 |
| SK      | 03.65      | 01.83 |
| CoK     | 01.59      | 00.43 |
| Matrix  | Correction | ZAF   |

Fig. S2 Cyclic voltammograms of different catalysts in N<sub>2</sub>-saturated (black line) and O<sub>2</sub>-saturated (red line) 0.1 M KOH solution at a potential scan rate of 5mV s<sup>-1</sup>. (a) as-sputtered, (b) Co/NS-CNT-400, (c) Co/NS-CNT-600, (d) Co/NS-CNT-800, (e) Co/N/CNT-600, and (f) NS-CNT-600,

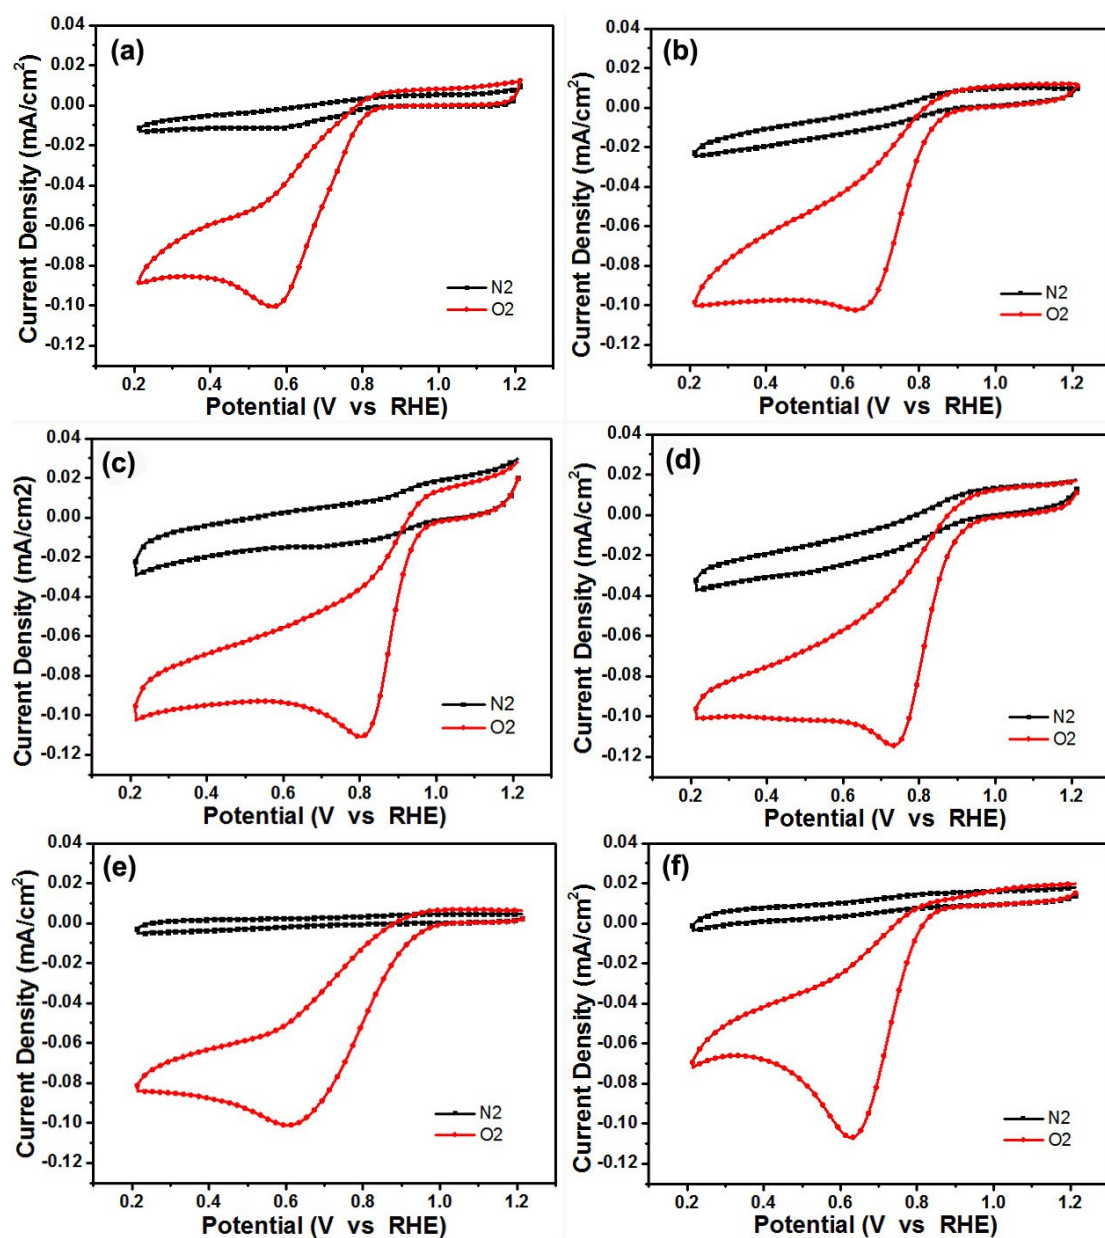

Supplement: c6ra00752j1.pdf [file c6ra00752j1.pdf]
